# Supplementary material for: MicroRNAs and Mammarenaviruses: Modulating Cellular Metabolism
Source: MDPI journal article supplement (doi:10.3390/cells9112525), 2020-11-23
Supplement: s1 [file s1]

**Table 2.** List of all miRNAs binding to different regions of same the RNA segment of different mammarenavirus species.

| microRNAs                       | Species (Genomic position)    |                                 |
|---------------------------------|-------------------------------|---------------------------------|
| New World – Clade A (L segment) |                               |                                 |
| hsa-miR-122b-3p                 | Flexal (2745 – 2755)          | Paraná (2814 – 1824)            |
| hsa-miR-181b-2-3p               | Allpahuayo (541 – 531)        | Flexal (4887 – 4877)            |
| hsa-miR-548aa                   | Allpahuayo (5822 – 5832)      | Whitewater Arroyo (6214 – 6224) |
| hsa-miR-548ap-3p                | Allpahuayo (5822 – 5832)      | Whitewater Arroyo (6214 – 6224) |
| hsa-miR-548d-3p                 | Allpahuayo (5821 – 5831)      | Whitewater Arroyo (6213 – 6223) |
| hsa-miR-548t-3p                 | Allpahuayo (5822 – 5832)      | Whitewater Arroyo (6214 – 6224) |
| hsa-miR-4299                    | Allpahuayo (3476 – 3486)      | Tamiami (3519 – 3529)           |
| New World – Clade A (S segment) |                               |                                 |
| hsa-miR-2052                    | Pirital (954–944)             | Bear Canyon (2422 – 2412)       |
|                                 | Pichindé (948–938)            | Allpahuayo (945 – 955)          |
| hsa-miR-5696                    | Allpahuayo (1239–1249)        | Flexal (1243 – 1253)            |
| hsa-miR-6830-3p                 | Pirital (1328–1338)           | Pichindé (1322 – 1332)          |
| New World – Clade B (L segment) |                               |                                 |
| hsa-miR-122b-3p                 | Aporé (2977–2967/7195 – 7185) | Machupo (2920–2910)             |
| hsa-miR-147b-5p                 | Aporé (6826–6816)             | Machupo (1424–1434)             |
|                                 | Tacaribe (6771 – 6761)        |                                 |
| hsa-miR-545-3p                  | Sabiá (560–550)               | Aporé (628 – 618)               |
| hsa-miR-620                     | Amapari (449–439)             | Junín (4114 – 4124)             |
| hsa-miR-1200                    | Cupixi (124–134)              | Guanarito (665–675)             |
| hsa-miR-1262                    | Machupo (2451 – 2441)         | Tacaribe (2432–2422)            |
| hsa-miR-3149                    | Machupo (3195 – 3185)         | Tacaribe (3173–3163)            |
|                                 | Xapuri (4629 – 4639)          |                                 |
| hsa-miR-4271                    | Chapare (2908–2898)           | Tacaribe (2909 – 2899)          |
| hsa-miR-4291                    | Sabiá (1745–1735)             | Guanarito (5106 – 5116)         |
| hsa-miR-12122                   | Amapari (3524–3534)           | Chapare (3552 – 3562)           |
|                                 | Tacaribe (3553 – 3563)        |                                 |
| New World – Clade B (S segment) |                               |                                 |
| hsa-miR-320a-5p                 | Junín (2412–2422)             | Guanarito (2385 – 2395)         |
| hsa-miR-329-5p                  | Chapare (2034–2044)           | Guanarito (2015 – 2025)         |
| Old World (L segment)           |                               |                                 |
| hsa-miR-9-5p                    | Ryukyu (4996 – 5006)          | Mobala (5050–5060)              |

|                 |                                          |                                                              |
|-----------------|------------------------------------------|--------------------------------------------------------------|
| hsa-miR-181b-5p | Ippy (1618–1608)                         | Luna (3565 – 3555)                                           |
| hsa-miR-181d-5p | Ippy (1618–1608)                         | Luna (3565–3555)                                             |
| hsa-miR-3120-3p | Lujo (3497–3487)                         | Lunk (3599–3589)                                             |
|                 | Merino Walk (5697 – 5687)                | Mopeia (3591–3581)                                           |
| hsa-miR-3134    | Alxa (5200 – 5190)                       | Wenzhou (2378–2388)                                          |
|                 | Lymphocytic choriomeningitis (1975–1985) |                                                              |
| hsa-miR-3189-5p | Lijiang (255–265)                        | Mopeia (284–294)                                             |
| hsa-miR-3941    | Ryukyu (1225–1215)                       | Lymphocytic choriomeningitis (896–906)                       |
| hsa-miR-4282    | Okahandja (3742–3732)                    | Loie River (2784–2794)                                       |
| hsa-miR-4460    | Lassa (209–199)                          | Lijiang (209–199/4747–4737)                                  |
| hsa-miR-4465    | Mopeia (1034–1044)                       | Ryukyu (1911–1921)                                           |
| hsa-miR-4735-3p | Lassa (2553–2563)                        | Merino Walk (2369–2359)                                      |
| hsa-miR-4753-5p | Lunk (618–608)                           | Lujo (5150–5160)                                             |
| hsa-miR-4760-5p | Solwezi (493–483)                        | Lunk (575 – 565)                                             |
| hsa-miR-4780    | Ippy (670–680)                           | Lunk (864–854)                                               |
| hsa-miR-5681a   | Luna (1709–1699)                         | Mariental (1649–1639)                                        |
| hsa-miR-5586-3p | Solwezi (6939–6949)                      | Mopeia (7070 – 7080)                                         |
| hsa-miR-6806-3p | Alxa (6870–6880)                         | Lujo (131–121)                                               |
| hsa-miR-6859-5p | Lassa (1706–1696)                        | Solwezi (2070–2060)                                          |
| hsa-miR-7109-5p | Lijiang (451–441)                        | Ippy (602–612)                                               |
| hsa-miR-8485    | Ryukyu (354–364/356–366/388–398)         | Lunk (418 – 428/420–430 / 422 – 432 / 424 – 434 / 426 – 436) |
| hsa-miR-9903    | Okahandja (1879 – 1889)                  | Luna (1983 – 1993)                                           |

**Old World (S segment)**

|                  |                       |                                         |
|------------------|-----------------------|-----------------------------------------|
| hsa-miR-1245b-3p | Lijiang (2975–2965)   | Mobala (2983–2973)                      |
| hsa-miR-1267     | Lijiang (2069–2059)   | Ryukyu (2124–2114)                      |
| hsa-miR-3650     | Souris (2438–2448)    | Wenzhou (2383–2393)                     |
| hsa-miR-3672     | Ippy (1215–1225)      | Lunk (1217–1227)                        |
| hsa-miR-4327     | Lunk (2716–2706)      | MerinoWalk (2721–2711)                  |
|                  | Mariental (2721–2711) | Souris (2777–2767)                      |
| hsa-miR-4773     | Ryukyu (1893–1883)    | Mopeia (1906–1896)                      |
| hsa-miR-5696     | Alxa (1242–1232)      | Lymphocyticchoriomeningitis (1242–1232) |

|                 |                         |                                            |
|-----------------|-------------------------|--------------------------------------------|
| hsa-miR-6516-3p | Lujo (1548 – 1538)      | Lijiang (1655 – 1645)                      |
|                 | Mariental (1673 – 1663) |                                            |
| hsa-miR-6740-5p | Alxa (2834 – 2824)      | Gairo (2788 – 2778)                        |
|                 | Lassa (2784 – 2774)     | Lymphocytic choriomeningitis (2787 – 2777) |
