# Supplementary material for: MicroRNAs and Mammarenaviruses: Modulating Cellular Metabolism
Source: MDPI journal article supplement (doi:10.3390/cells9112525), 2020-11-23
Supplement: s1 [file s1]

**Table3.**List of all miRNAs binding to S and L segments of different mammarenaviruses.

| microRNAs       | Species(Genomic position)   |                                |
|-----------------|-----------------------------|--------------------------------|
|                 | Lsegment                    | Ssegment                       |
| hsa-miR-122b-3p | Aporé(2977–2967/7195–7185)  | Alxa(1328–1338)                |
|                 | Flexal(2745–2755)           |                                |
|                 | Machupo(2920–2910)          |                                |
|                 | Paraná(2814–2824)           |                                |
| hsa-miR-9-5p    | Pichindé(4923–4933)         | Tacaribe(2639–2649)            |
|                 | Ryukyu(4996–5006)           |                                |
|                 | Mobala(5050–5060)           |                                |
| hsa-miR-3611    | Aporé(3887–3897)            | Xapuri(1849–1859)              |
|                 | Flexal(3774–3784)           |                                |
| hsa-miR-3617-5p | Pichindé(7003–6993)         | Mopeia(2392–2402)              |
|                 |                             | Paraná(1198–1208)              |
| hsa-miR-1229-3p | Cupixi(4426–4436)           | Lassa(2783–2793)               |
|                 | Oliveros(6625–6635)         |                                |
| hsa-miR-3085-5p | Amapari(3334–3324)          | Lujo(1316–1306)                |
|                 | Lunk(1709–1699)             |                                |
| hsa-miR-4256    | Tamiami(1844–1834)          | Chapare(856–866)               |
|                 | Xapuri(2518–2528)           |                                |
| hsa-miR-3913-5p | Chapare(2959–2969)          | Luna(2453–2463)                |
|                 | Lujo(2961–2971)             |                                |
| hsa-miR-4735-3p | Lassa(2553–2563)            | WhitewaterArroyo(1734–1744)    |
|                 | MerinoWalk(2369–2359)       |                                |
| hsa-miR-4762-5p | Chapare(1305–1315)          | Paraná(2680–2870)              |
|                 | Latino(3939–3949)           |                                |
| hsa-miR-4667-5p | Solwezi(2213–2203)          | Sabiá(1568–1578)               |
|                 |                             | Xapuri(1686–1676)              |
| hsa-miR-5700    | Sabiá(1039–1029/1030–1040)  | Okahandja(1084–1074/1075–1085) |
| hsa-miR-376a-3p | Cupixi(1543–1553/3120–3130) | Paraná(66–76)                  |
| hsa-miR-376b-3p | Cupixi(1543–1553/3120–3130) | Paraná(66–76)                  |
| hsa-miR-542-3p  | Xapuri(6128–6138)           | Amapari(235–225)               |
| hsa-miR-4251    | Pichindé(742–732)           | MerinoWalk(2239–2229)          |
| hsa-miR-3167    | LoieRiver(1277–1267)        | WhitewaterArroyo(2804–2814)    |
| hsa-miR-3646    | Lijiang(1865–1855)          | Machupo(896–906)               |
| hsa-miR-3529-3p | Guanarito(4043–4033)        | Alxa(3051–3041)                |
| hsa-miR-4326    | Aporé(4447–4457)            | Gairo(171–181)                 |
| hsa-miR-6764-5p | Flexal(4707–4717)           | Machupo(2867–2877)             |
| hsa-miR-548b-3p | Amapari(4037–4047)          | Lassa(2305–2295)               |
| hsa-miR-4699-5p | Lassa(5320–5310)            | Chapare(761–771)               |
| hsa-miR-301b-3p | Pichindé(755–765)           | Lassa(100–90)                  |
| hsa-miR-3130-5p | Lassa(2713–2723)            | Pichindé(1544–1534)            |

|                    |                             |                           |
|--------------------|-----------------------------|---------------------------|
| hsa-miR-1255b-2-3p | Allpahuayo(6270–6280)       | Latino(2001–1991)         |
| hsa-miR-8087       | Pirital(5640–5630)          | Wenzhou(792–802)          |
| hsa-miR-6844       | Amapari(2980–2970)          | MerinoWalk(1740–1750)     |
| hsa-miR-10393-3p   | Machupo(4049–4059)          | Sabiá(1802–1792)          |
| hsa-miR-4503       | WhitewaterArroyo(3624–3634) | Luna(2002–1992)           |
| hsa-miR-130b-3p    | Pichindé(755–765)           | Lassa(100–90)             |
| hsa-miR-330-5p     | Gairo(2305–2315)            | Machupo(2704–2694)        |
| hsa-miR-335-5p     | Junín(1420–1410)            | Lassa(633–623)            |
| hsa-miR-7114-5p    | Alxa(458–448)               | WhitewaterArroyo(503–493) |
