# Supplementary figures and images for: MicroRNAs and Mammarenaviruses: Modulating Cellular Metabolism
Source: MDPI journal article supplement (doi:10.3390/cells9112525), 2020-11-23

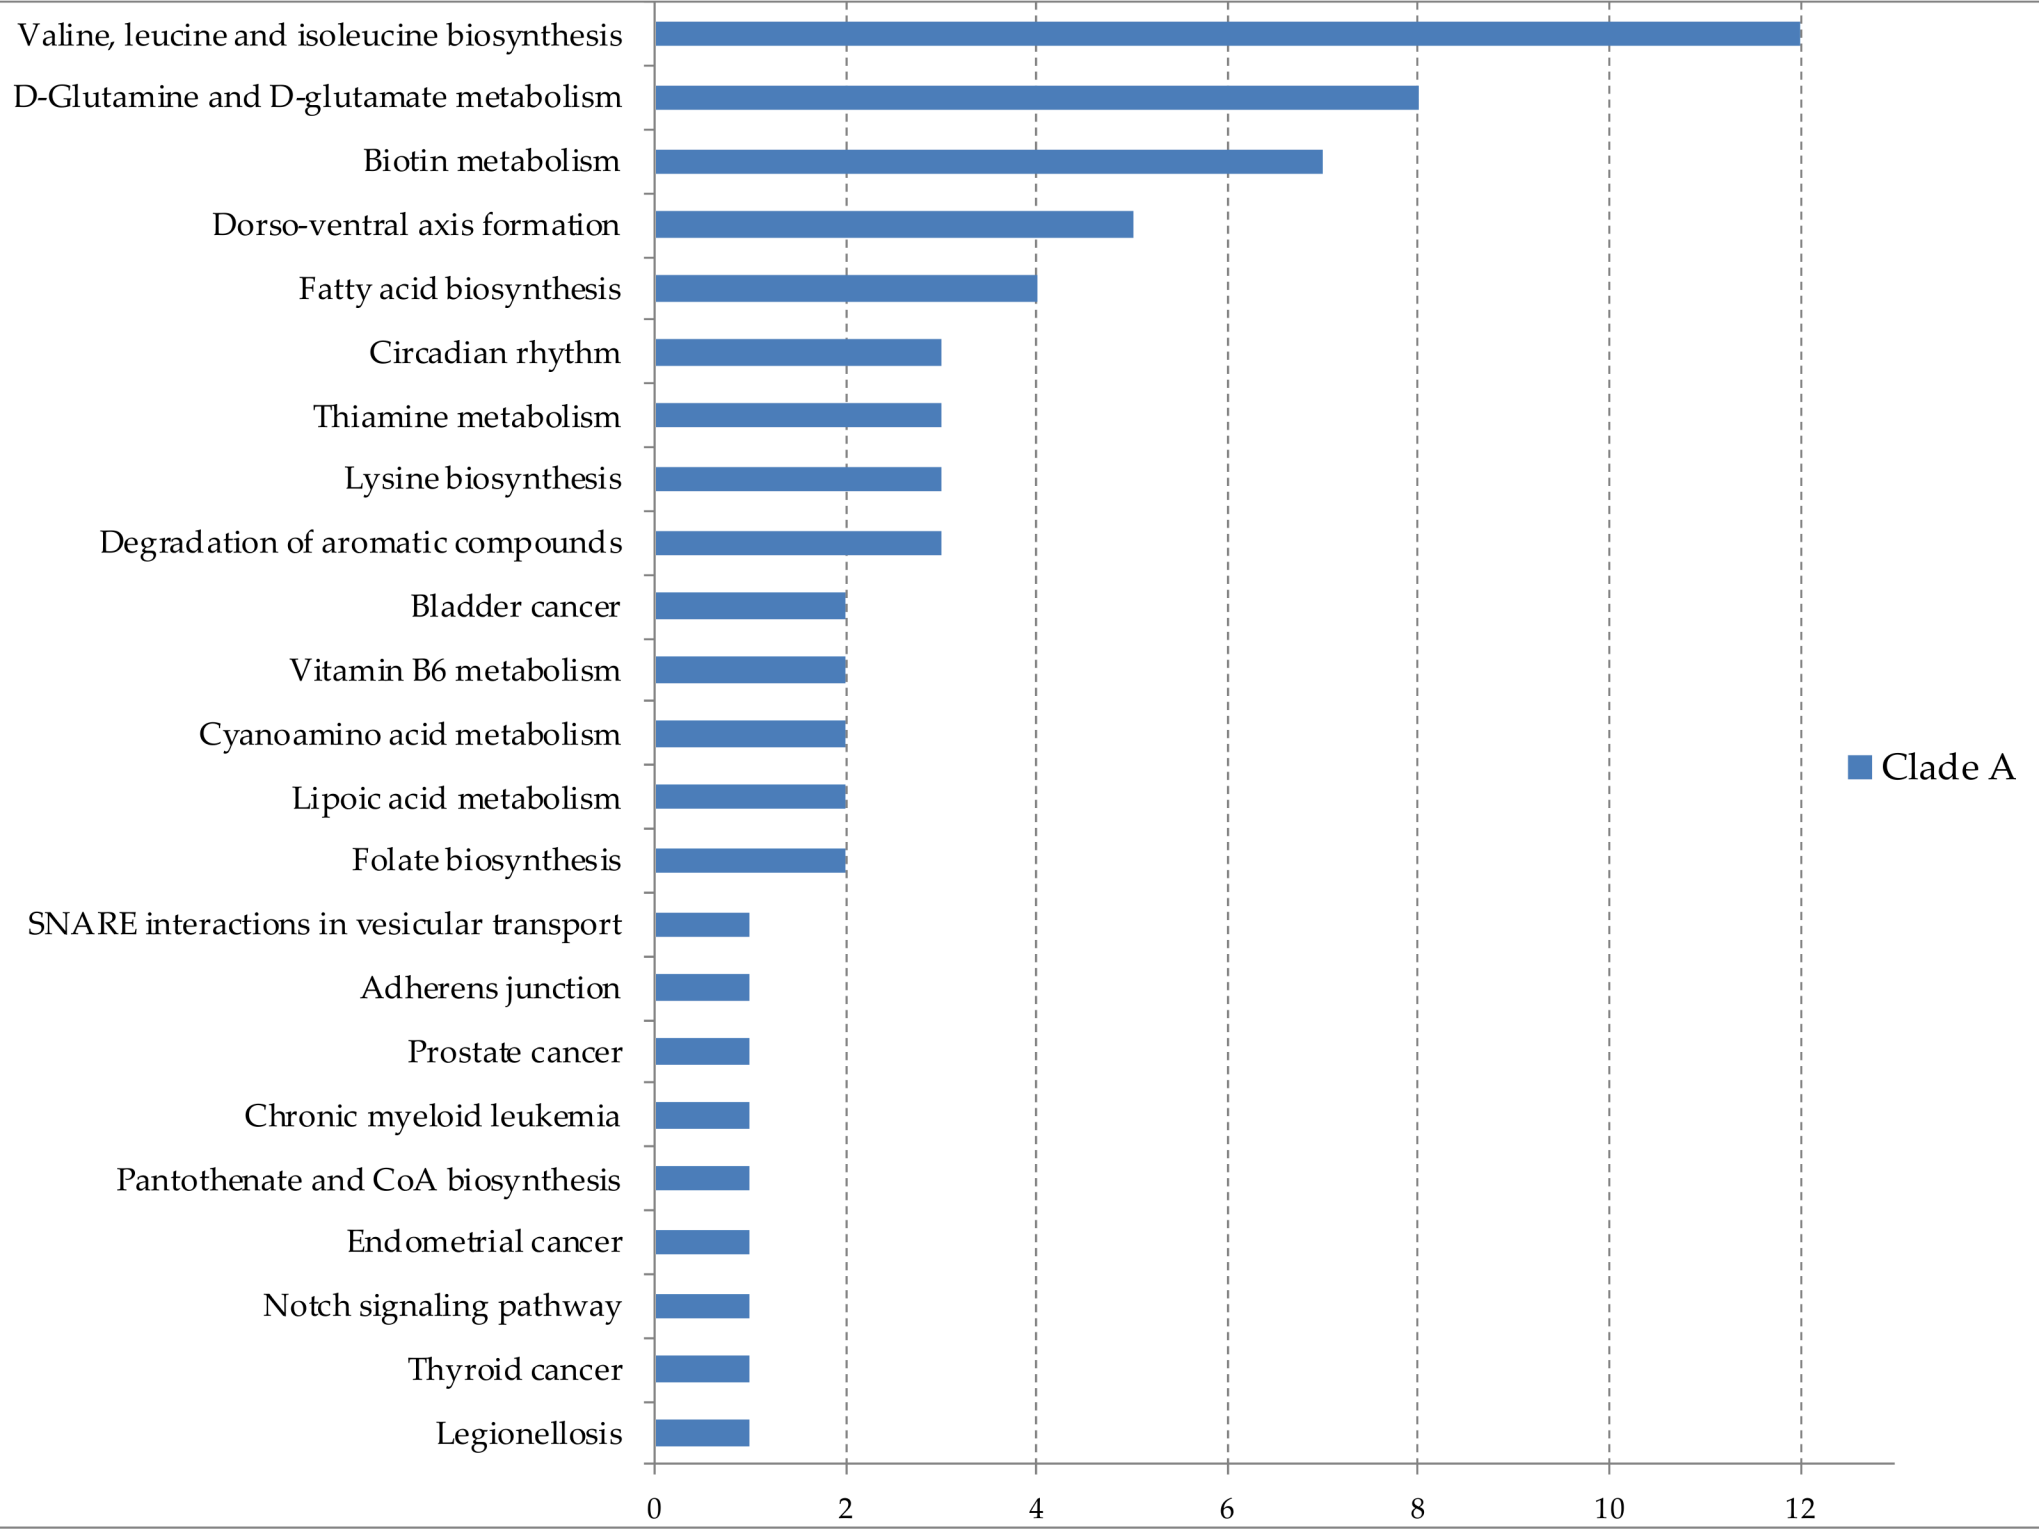



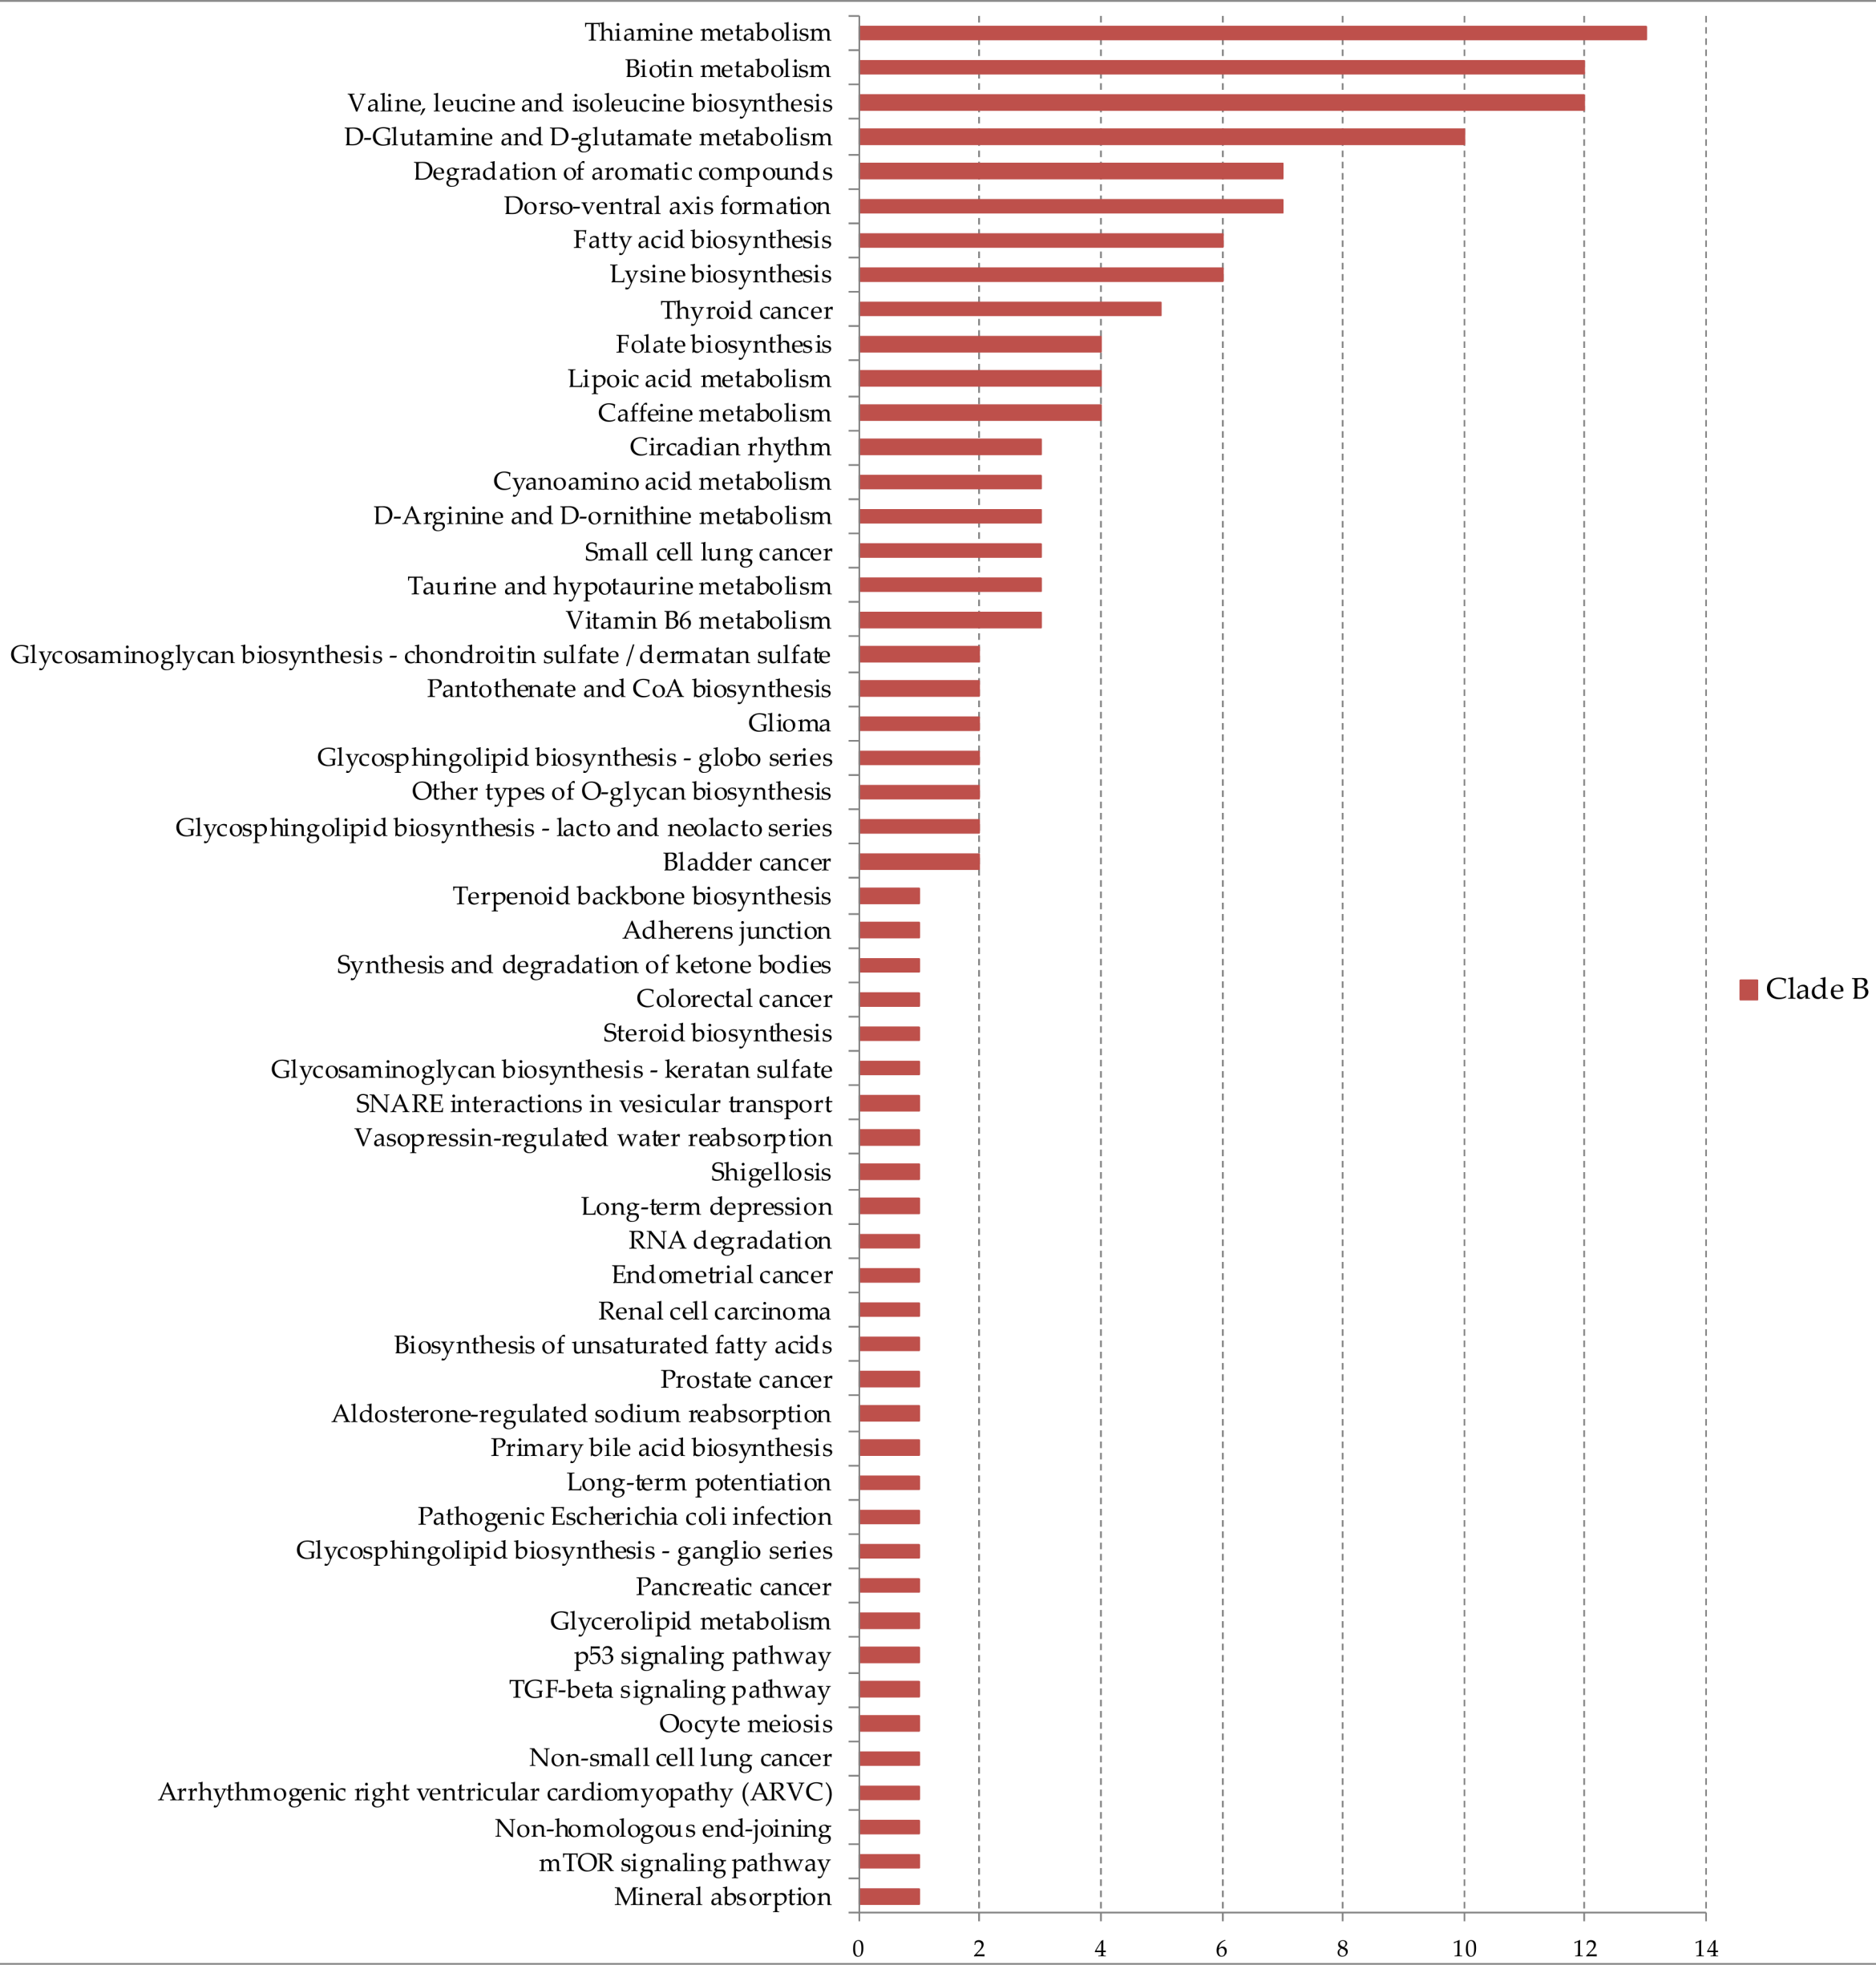

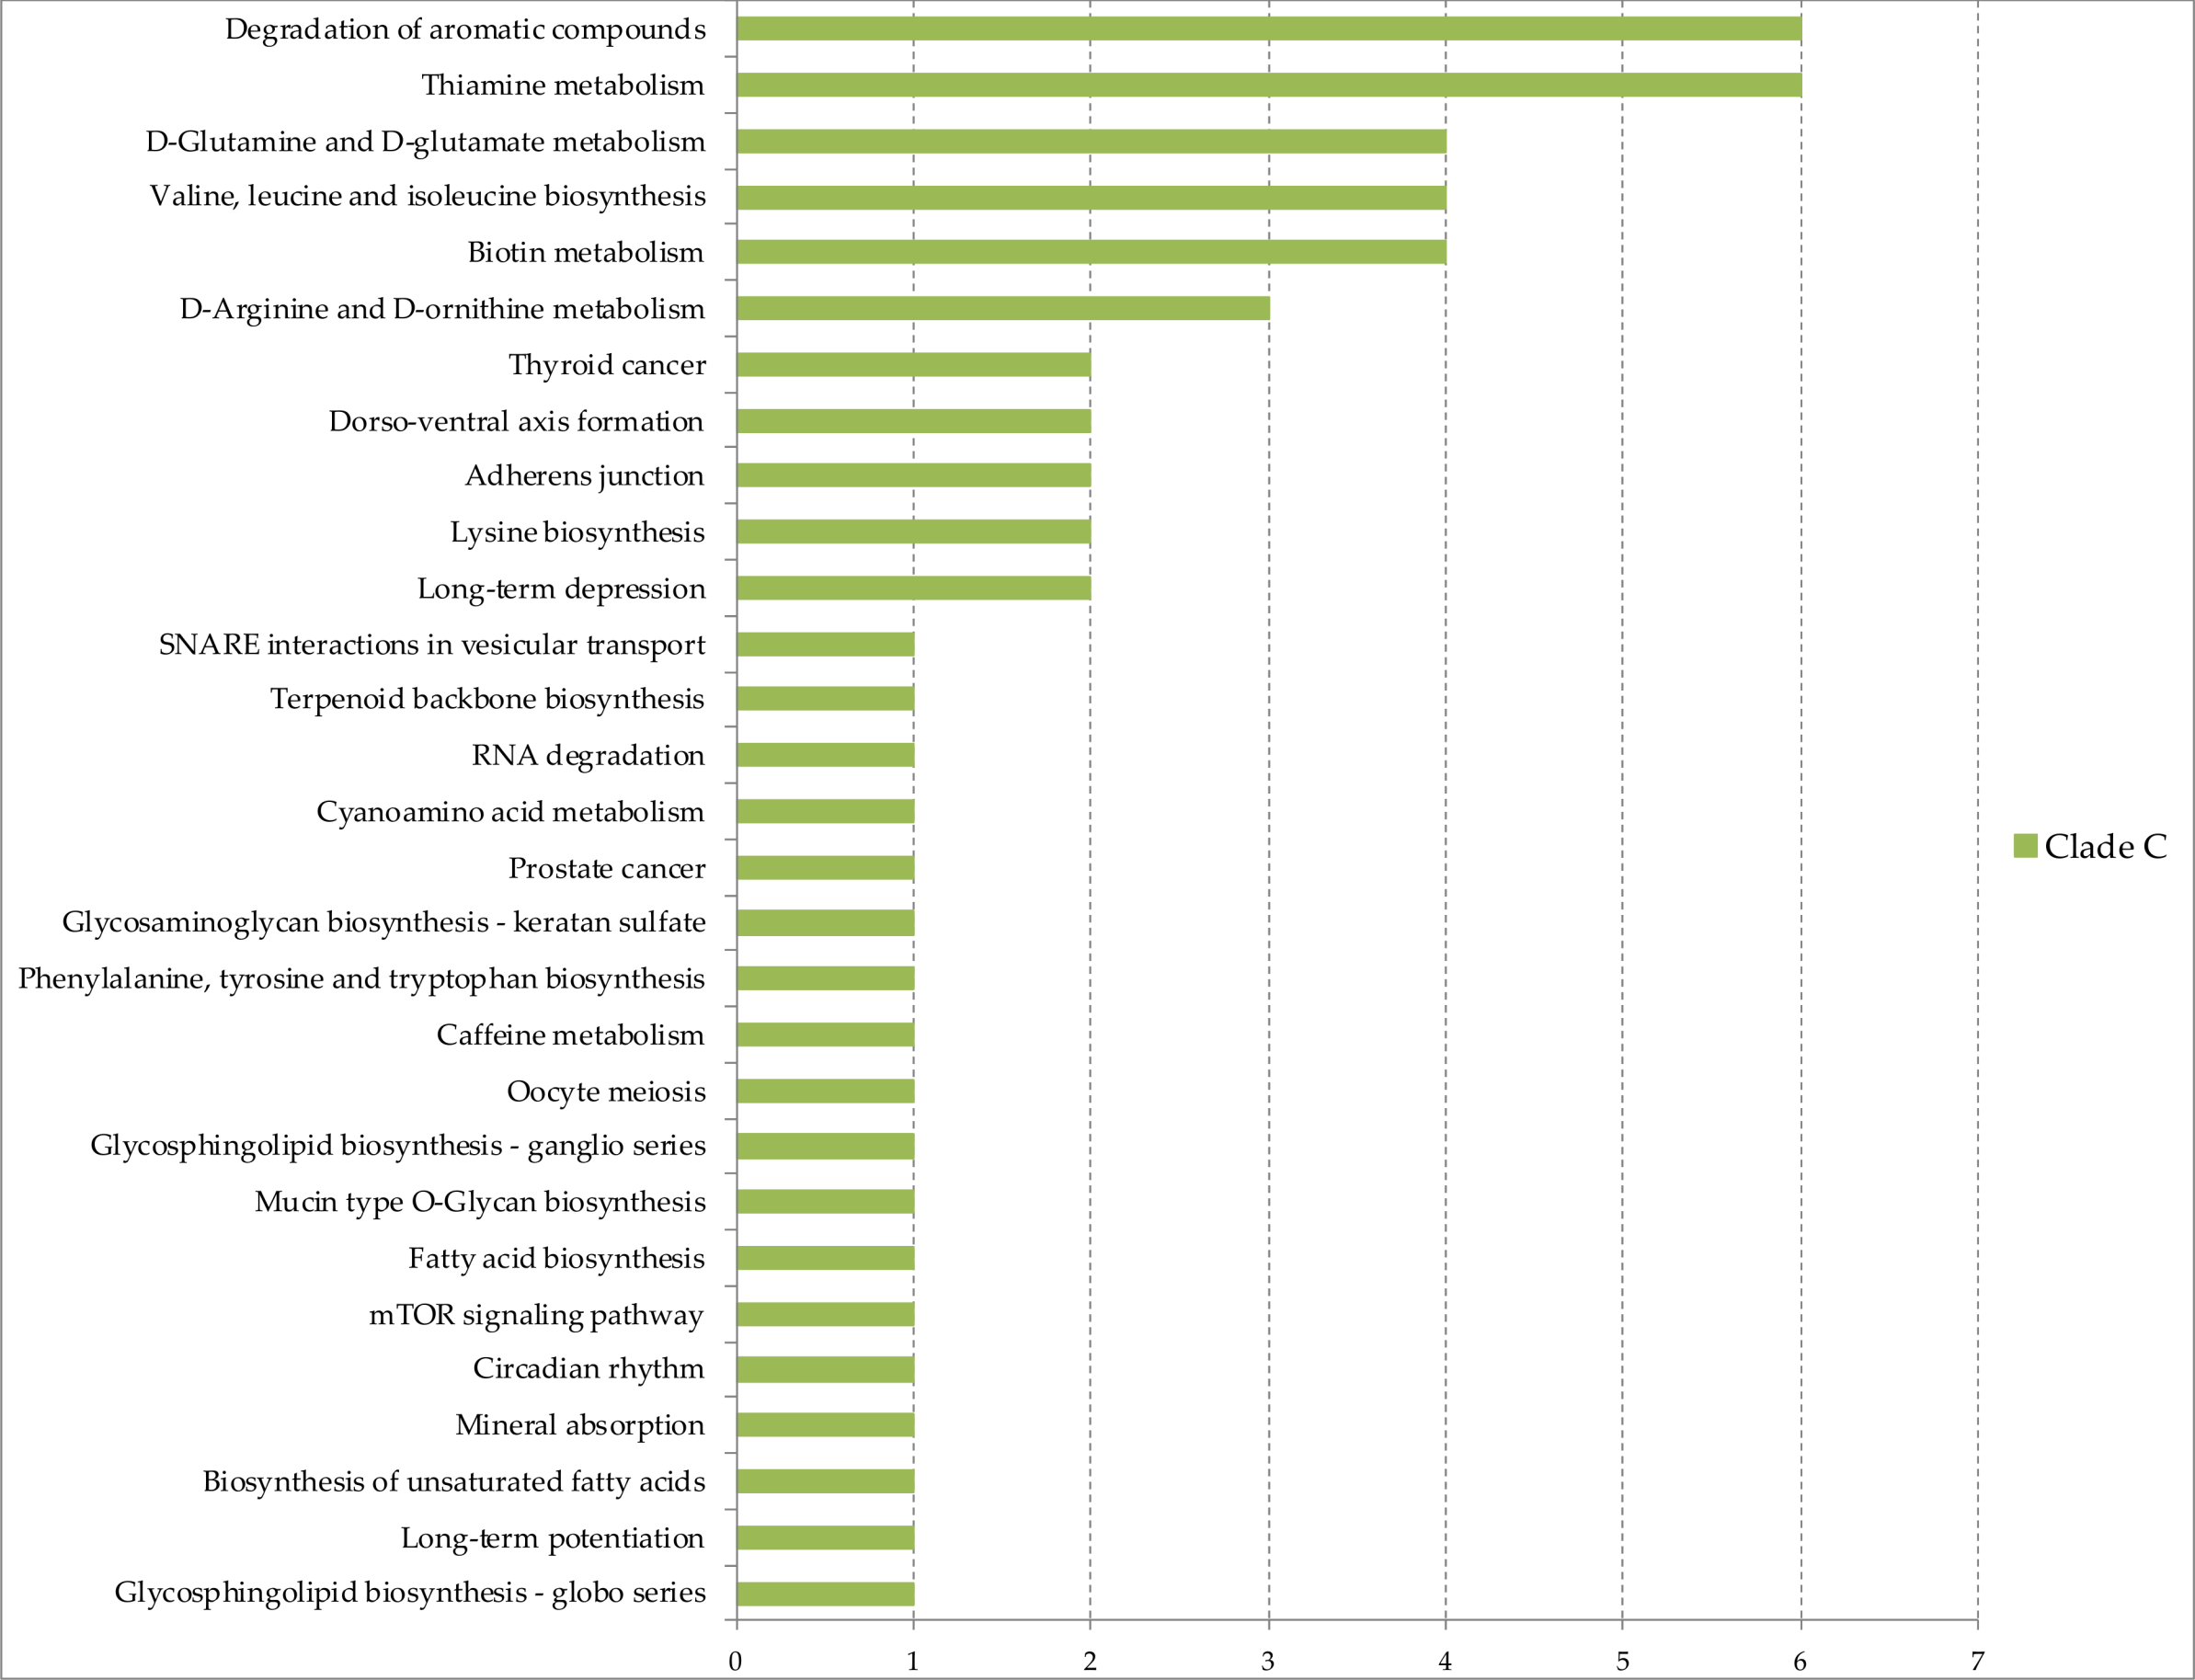

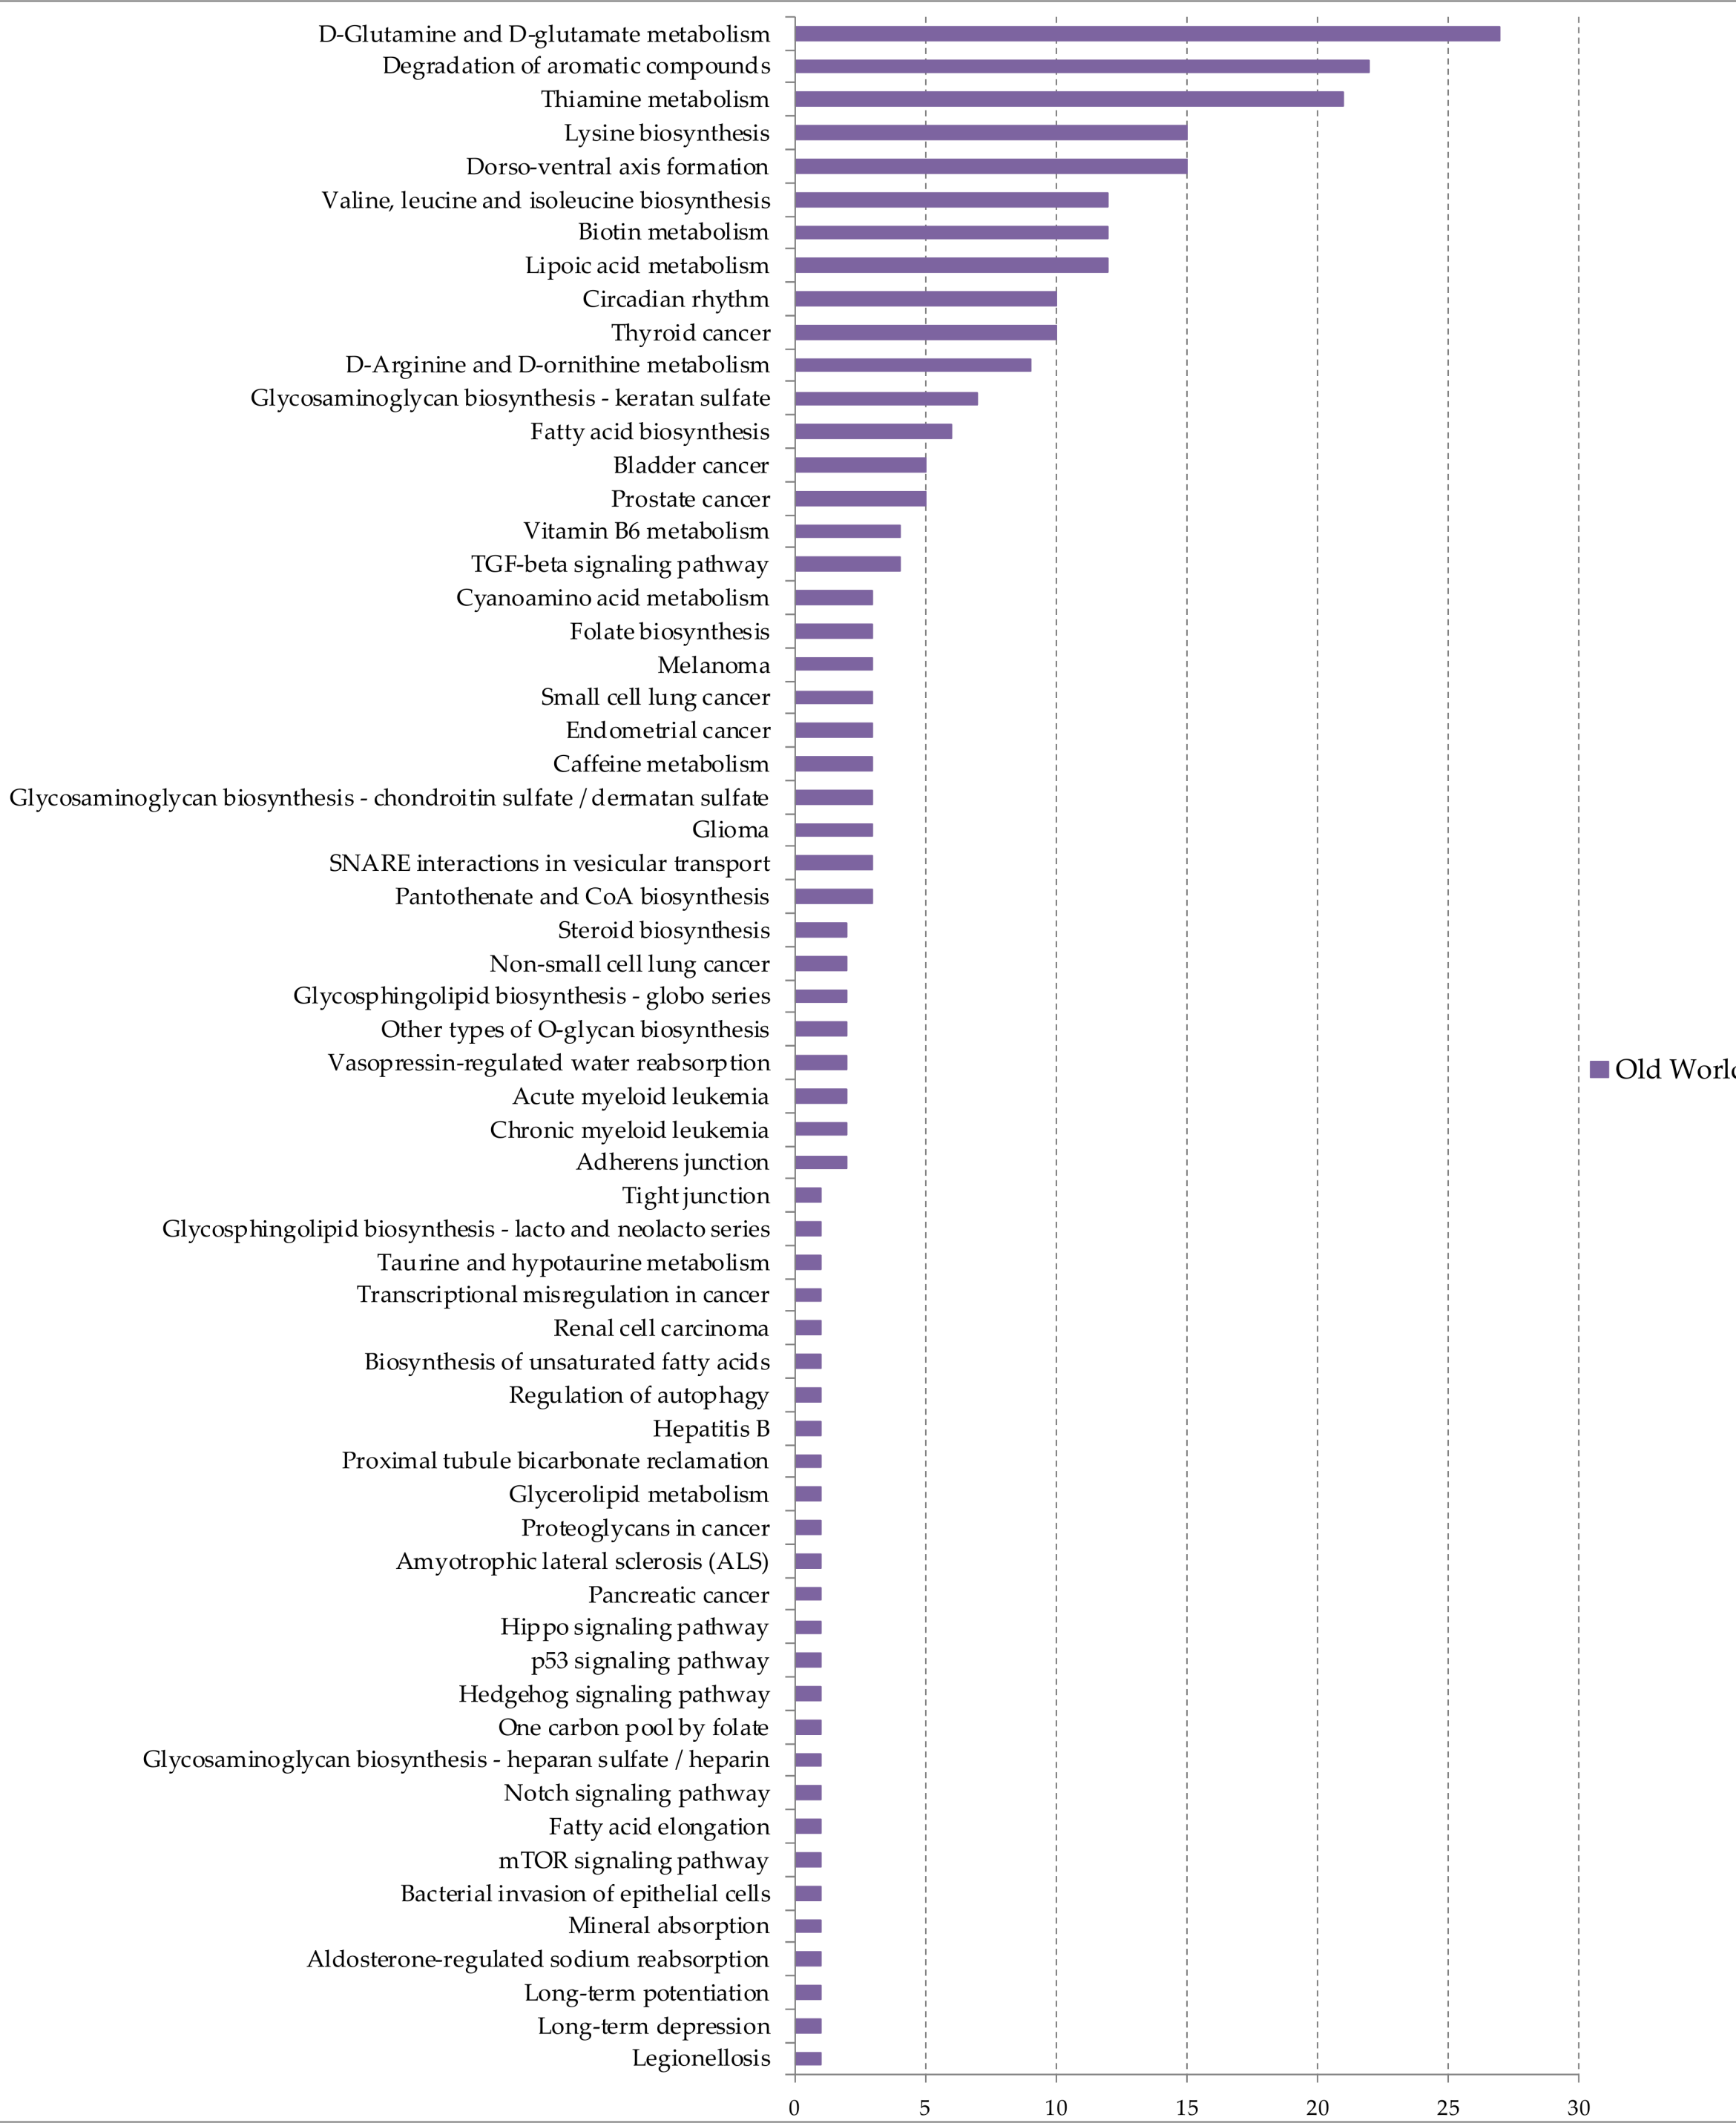

Supplement: s1 [file s1]
